# Supplementary material for: FAIR v1.3: a simple emissions-based impulse response and carbon cycle model
Source: Copernicus journal article supplement (doi:10.5194/gmd-11-2273-2018), 2018-06-18
Supplement: Supplementary file 1 [file gmd-11-2273-2018-supplement.zip]

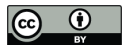

## *Supplement of*

# **FAIR v1.3: a simple emissions-based impulse response and carbon cycle model**

**Christopher J. Smith et al.**

*Correspondence to:* Christopher J. Smith (c.j.smith1@leeds.ac.uk)

- [gmd-11-2273-2018-supplement-title-page.pdf](#)
- [FAIR.pdf](#)
- [gmd-2017-266-supplement-version4.pdf](#)

The copyright of individual parts of the supplement might differ from the CC BY 4.0 License.
